# Supplementary material for: Generation of reactive oxygen species by photolysis of the ruthenium(ii) complex Ru(NH3)5(pyrazine)2+ in oxygenated solution
Source: Royal Society of Chemistry journal article supplement (doi:10.1039/b617350k), 2007-03-20

## Generation of Reactive Oxygen Species by Photolysis of the Ruthenium(II) Complex $\text{Ru}(\text{NH}_3)_5(\text{pyrazine})^{2+}$ in Oxygenated Solution

*Roberto Santana da Silva<sup>a,b,c,\*</sup>, Mario Sergio P. Marchesi<sup>a</sup>, Antonio Claudio Tedesco<sup>c</sup>,  
Alexander Mikhailovsky<sup>b</sup> and Peter C. Ford<sup>b,\*</sup>*

**Figure S1:** Integrated EPR spectrum of TEMPO in phosphate buffer solution pH = 7.40 and in the presence of  $\text{Ru}(\text{NH}_3)_5\text{pz}^{2+}$  complex. Solid line: initial spectrum; dashed line: after 40 min photolysis at 436 nm. The EPR experiments were conducted in an EMX spectrometer from Bruker instrument operated near 9.80 GHz at 0.35 mW power and 4.0 G modulation amplitude.

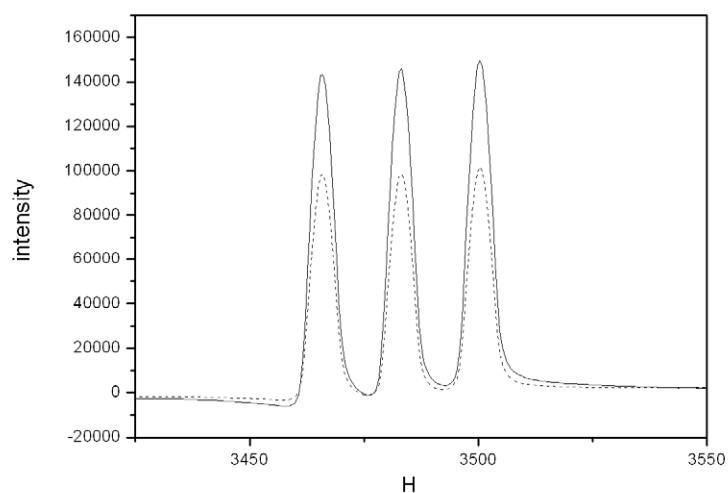

Supplement: b617350k.pdf [file b617350k.pdf]
